# Supplementary material for: Archival processes of the water stable isotope signal in East Antarctic ice cores
Source: Copernicus journal article supplement (doi:10.5194/tc-12-1745-2018), 2018-05-24
Supplement: Supplementary file 1 [file tc-12-1745-2018-supplement.zip]

Archive with 3 entries (3 files):
- tc-12-1745-2018-supplement-title-page.pdf
- Dataset_TC_2018.xlsx
- Time lapse growth of snow crystal-HD.mp4
