# Supplementary material for: Archival processes of the water stable isotope signal in East Antarctic ice cores
Source: Copernicus journal article supplement (doi:10.5194/tc-12-1745-2018), 2018-05-24
Supplement: Supplementary file 1 [file tc-12-1745-2018-supplement.zip › Dataset_TC_2018.xlsx]

## Sheet: Fig3 SUNITDC
Dataset from Casado et al (2018) : Archival processes of the water stable isotope signal in East Antarctic ice cores
Contact : mathieu.casado@gmail.com
doi: 10.5194/tc-2017-243
Campaign SUNITDC: 2011
For more information, refer to the manuscript
Date	δ18Os (‰)
2010-12-03	-53.9612
2010-12-10	-50.3667
2010-12-17	-48.7032
2010-12-24	-48.89
2010-12-31	-50.1197
2011-01-14	-48.3521
2011-01-21	-48.4612
2011-02-04	-50.191
2011-02-25	-51.9435
2011-03-05	-52.5227
2011-03-13	-51.9489
2011-03-18	-53.3247
2011-03-25	-48.1881
2011-04-01	-53.161
2011-04-08	-51.8324
2011-04-15	-51.6331
2011-04-23	-53.713
2011-04-29	-52.3728
2011-05-07	-59.7205
2011-05-13	-54.0844
2011-05-20	-53.6387
2011-05-27	-59.2069
2011-06-04	-56.3345
2011-06-11	-57.6111
2011-06-17	-58.1675
2011-06-25	-57.532
2011-07-01	-57.2212
2011-07-08	-56.2809
2011-07-17	-59.8952
2011-07-22	-50.6313
2011-07-29	-54.9308
2011-08-05	-49.9453
2011-08-12	-56.4361
2011-08-19	-53.8421
2011-08-26	-55.9784
2011-09-03	-56.605
2011-09-09	-50.827
2011-09-16	-57.2922
2011-09-24	-61.3545
2011-09-30	-55.8913
2011-10-07	-56.2615
2011-10-14	-57.1726
2011-10-21	-58.0719
2011-10-28	-60.8071
2011-11-05	-54.3854
2011-11-11	-54.6808
2011-11-17	-55.0829
2011-11-25	-54.5642
2011-12-03	-53.766
2011-12-09	-53.327

## Sheet: Fig3 PREREC
Dataset from Casado et al (2018) : Archival processes of the water stable isotope signal in East Antarctic ice cores
Contact : mathieu.casado@gmail.com
doi: 10.5194/tc-2017-243
Campaign PREREC: 2007 - 2012
For more information, refer to the manuscript
Date	δ18Op (‰)	δ18Os (‰)
2007-12-17	-42.92
2007-12-18	-44.56
2007-12-22	-42.86
2007-12-28	-52.88
2007-12-30	-38.32
2008-01-08	-48.11
2008-01-09	-46.6
2008-01-14	-45.18
2008-01-15	-45.45
2008-01-17	-45.66
2008-01-24	-50.5
2008-01-27	-50.87
2008-02-27	-48.47
2008-03-09	-54.68
2008-03-10	-53.55
2008-03-13	-59.68
2008-03-18	-60.75
2008-03-24	-51.09
2008-03-26	-49.1
2008-03-30	-56.37
2008-04-01	-51.77
2008-04-02	-52.25
2008-04-06	-54.28
2008-04-07	-61.59
2008-04-11	-58.29
2008-04-13	-61.07
2008-04-15	-53.35
2008-04-16	-56.77
2008-04-20	-71.23
2008-04-23	-66.64
2008-04-27	-53.08
2008-04-29	-52.7
2008-04-30	-43.69
2008-05-04	-51.51
2008-05-08	-60.03
2008-05-11	-67.2
2008-05-19	-65.35
2008-05-22	-53.84
2008-05-25	-57.44
2008-06-01	-61.36
2008-06-16	-71.54
2008-06-28	-55.68
2008-06-30	-58.56
2008-07-04	-59.12
2008-07-16	-59.38
2008-07-22	-64.6
2008-07-23	-60.75
2008-07-29	-58.12
2008-08-03	-59.36
2008-08-08	-65.8
2008-08-11	-59.12
2008-08-12	-61.28
2008-08-18	-53.67
2008-08-19	-49.35
2008-08-20	-50.58
2008-08-24	-61.3
2008-08-28	-59.88
2008-08-29	-50.51
2008-09-02	-55.6
2008-09-03	-50.54
2008-09-07	-62.87
2008-09-08	-56.06
2008-09-09	-53.04
2008-09-10	-56.23
2008-09-11	-59.24
2008-09-15	-67.71
2008-09-16	-68.66
2008-09-19	-49.9
2008-09-30	-55.62
2008-10-02	-62.26
2008-10-09	-62.55
2008-10-12	-55.54
2008-10-14	-51.65
2008-11-07	-46.62
2008-11-10	-36.27
2008-11-11	-43.7
2008-11-12	-38.69
2008-11-17	-55.08
2008-11-18	-55.14
2008-11-19	-52.14
2008-11-20	-54.46
2008-11-21	-52.38
2008-11-23	-46.46
2008-12-05	-47.61
2008-12-26	-46.69
2009-01-07	-49.99
2009-01-08	-42.74
2009-01-14	-51.03
2009-01-16	-44.15
2009-01-22	-39.12
2009-01-23	-39.12
2009-01-25	-43.1
2009-02-02	-48.4
2009-02-03	-42.7
2009-02-07	-38.68
2009-02-08	-37.32
2009-02-09	-44.98
2009-02-10	-50.96
2009-02-12	-48.99
2009-02-13	-49.35
2009-02-19	-43.57
2009-02-20	-42.86
2009-02-22	-55.09
2009-02-28	-53
2009-03-05	-53.91
2009-03-06	-56.41
2009-03-07	-54.65
2009-03-09	-61.99
2009-03-10	-55.5
2009-03-11	-49.86
2009-03-12	-50.4
2009-03-13	-46.39
2009-03-14	-48.47
2009-03-16	-56.49
2009-03-19	-53.84
2009-03-21	-51.73
2009-03-22	-53.51
2009-03-23	-54.59
2009-03-24	-58.04
2009-03-25	-51.95
2009-03-26	-52.38
2009-03-27	-54.32
2009-03-29	-58.96
2009-03-30	-63.17
2009-04-05	-66.98
2009-04-06	-56.96
2009-04-07	-57.46
2009-04-09	-62.49
2009-04-12	-61.97
2009-04-13	-60.43
2009-04-15	-56.96
2009-04-17	-62.28
2009-04-18	-60.06
2009-04-20	-57.77
2009-04-21	-56.74
2009-04-22	-60.07
2009-04-23	-61.31
2009-04-24	-63.64
2009-04-26	-63.46
2009-04-27	-64.83
2009-04-29	-62.42
2009-04-30	-60.99
2009-05-01	-60.84
2009-05-03	-53.15
2009-05-04	-52.5
2009-05-05	-54.1
2009-05-08	-60.64
2009-05-10	-53.92
2009-05-11	-47.97
2009-05-13	-54.85
2009-05-14	-60.61
2009-05-15	-54.15
2009-05-16	-55.19
2009-05-19	-64.11
2009-05-20	-56.79
2009-05-23	-55.84
2009-05-26	-67.12
2009-05-27	-67.81
2009-05-28	-56.91
2009-05-29	-59.59
2009-05-31	-59.41
2009-06-01	-60.96
2009-06-03	-61.12
2009-06-07	-58.77
2009-06-08	-61.36
2009-06-11	-66.37
2009-06-14	-51.19
2009-06-15	-58.57
2009-06-16	-58.32
2009-06-17	-55.39
2009-06-23	-54.59
2009-06-24	-59.86
2009-06-25	-59.08
2009-06-28	-58.19
2009-06-30	-56.12
2009-07-01	-48.89
2009-07-05	-51.77
2009-07-08	-54.04
2009-07-09	-54.74
2009-07-10	-49.27
2009-07-12	-47.89
2009-07-13	-49.65
2009-07-14	-49.77
2009-07-16	-57.11
2009-07-19	-54.1
2009-07-22	-60.68
2009-07-26	-67.01
2009-07-28	-56.47
2009-07-29	-53.28
2009-08-02	-62.23
2009-08-05	-63.24
2009-08-09	-57.55
2009-08-16	-55.16
2009-08-17	-64.1
2009-08-19	-55.29
2009-08-20	-53.81
2009-08-24	-60.77
2009-08-28	-58.54
2009-08-30	-63.72
2009-09-08	-52.16
2009-09-10	-53.71
2009-09-13	-42.95
2009-09-14	-45.09
2009-09-17	-53.93
2009-09-20	-55.93
2009-09-24	-64.46
2009-09-25	-64.54
2009-09-27	-64.27
2009-09-28	-64.92
2009-09-30	-56.33
2009-10-04	-59.73
2009-10-08	-58.76
2009-10-11	-52.41
2009-10-18	-54.69
2009-10-21	-56.04
2009-10-22	-57.58
2009-10-23	-60.7
2009-10-30	-55.58
2009-12-09	-46.4
2009-12-25	-55.59
2010-01-08	-46.42
2010-01-09	-35.46
2010-01-10	-43.26
2010-01-12	-56.75
2010-01-14	-42.17
2010-01-15	-50.95
2010-01-16	-46.93
2010-01-17	-49.96
2010-01-18	-44.44
2010-01-19	-39.91
2010-01-22	-49.95
2010-01-24	-41.04
2010-01-26	-55.28
2010-01-27	-54.59
2010-01-29	-44.38
2010-01-30	-43.75
2010-01-31	-50.14
2010-02-02	-42.12
2010-02-03	-45.67
2010-02-05	-51.96
2010-02-06	-43.83
2010-02-07	-52.43
2010-02-08	-41.13
2010-02-09	-48.27
2010-02-10	-47.53
2010-02-12	-47.65
2010-02-13	-49.2
2010-02-14	-49.77
2010-02-15	-53.79
2010-02-20	-52.47
2010-02-23	-53.95
2010-02-24	-52.48
2010-02-25	-46.32
2010-02-26	-52.3
2010-03-01	-47.1
2010-03-02	-57.55
2010-03-03	-52.06
2010-03-04	-50.27
2010-03-05	-47.64
2010-03-06	-45.56
2010-03-07	-47.49
2010-03-09	-54.66
2010-03-10	-56.66
2010-03-11	-56.14
2010-03-12	-55.35
2010-03-13	-56.85
2010-03-15	-54.89
2010-03-16	-56.87
2010-03-18	-54.54
2010-03-19	-53.91
2010-03-20	-49.58
2010-03-21	-63.4
2010-03-22	-64.83
2010-03-24	-64.71
2010-03-25	-63.37
2010-03-26	-66.05
2010-03-27	-66.22
2010-03-28	-67.42
2010-03-29	-63.16
2010-03-30	-61.74
2010-03-31	-46.27
2010-04-01	-47.49
2010-04-02	-50.31
2010-04-03	-61.98
2010-04-04	-61.3
2010-04-05	-67.61
2010-04-06	-57.15
2010-04-07	-56.25
2010-04-08	-55.77
2010-04-09	-56.63
2010-04-10	-67.16
2010-04-11	-69.45
2010-04-13	-66.02
2010-04-14	-67.28
2010-04-15	-66.26
2010-04-16	-62.22
2010-04-17	-56.64
2010-04-18	-70.33
2010-04-19	-73.63
2010-04-20	-56.09
2010-04-21	-57.62
2010-04-22	-57.21
2010-04-23	-58
2010-04-24	-61.88
2010-04-25	-58.73
2010-04-26	-52.69
2010-04-27	-53.89
2010-04-28	-58.03
2010-04-29	-58.81
2010-04-30	-63.03
2010-05-02	-59.3
2010-05-03	-56.17
2010-05-04	-63.62
2010-05-05	-59.1
2010-05-06	-57.21
2010-05-07	-59.77
2010-05-08	-63.45
2010-05-09	-60.08
2010-05-10	-62.06
2010-05-11	-62.14
2010-05-12	-64.5
2010-05-13	-63.25
2010-05-14	-65.35
2010-05-15	-66.16
2010-05-16	-67.51
2010-05-17	-71.03
2010-05-18	-64.32
2010-05-20	-67.81
2010-05-21	-70.46
2010-05-22	-62.67
2010-05-23	-67.87
2010-05-24	-61.72
2010-05-25	-60.86
2010-05-26	-65.29
2010-05-27	-73.8
2010-05-28	-73.61
2010-05-29	-63.41
2010-05-30	-64.94
2010-05-31	-70.12
2010-06-01	-67.32
2010-06-02	-62.29
2010-06-03	-61.99
2010-06-04	-63.52
2010-06-05	-70.33
2010-06-06	-68.87
2010-06-07	-70.77
2010-06-08	-71.39
2010-06-09	-70.04
2010-06-10	-68.53
2010-06-11	-69.69
2010-06-12	-69.54
2010-06-13	-71.47
2010-06-14	-71.72
2010-06-15	-71.91
2010-06-17	-68.01
2010-06-18	-72.35
2010-06-19	-76.22
2010-06-20	-73.03
2010-06-21	-73.99
2010-06-22	-75.68
2010-06-23	-75.54
2010-06-25	-70.01
2010-06-26	-72.23
2010-06-27	-75
2010-06-28	-73.95
2010-06-29	-73.31
2010-06-30	-68.9
2010-07-01	-65.75
2010-07-02	-66.44
2010-07-03	-68.79
2010-07-04	-68.28
2010-07-06	-61.31
2010-07-07	-63.4
2010-07-08	-66.95
2010-07-09	-67.12
2010-07-11	-65.64
2010-07-12	-67.25
2010-07-13	-71.56
2010-07-14	-71.76
2010-07-16	-73.14
2010-07-17	-71.84
2010-07-18	-73.32
2010-07-20	-79.11
2010-07-21	-80.6
2010-07-22	-58.82
2010-07-23	-54.74
2010-07-24	-66.96
2010-07-25	-69.47
2010-07-26	-76.16
2010-07-27	-70.69
2010-07-28	-71.13
2010-07-29	-70.01
2010-07-30	-69.63
2010-07-31	-67.7
2010-08-01	-70.64
2010-08-02	-56.32
2010-08-03	-63.57
2010-08-04	-64.68
2010-08-05	-64.94
2010-08-06	-66.14
2010-08-07	-61.9
2010-08-08	-66.1
2010-08-09	-61.77
2010-08-10	-58.95
2010-08-11	-62.29
2010-08-12	-68.78
2010-08-13	-69.36
2010-08-14	-52.38
2010-08-15	-51.76
2010-08-16	-55.76
2010-08-17	-59.46
2010-08-18	-61.44
2010-08-19	-62.54
2010-08-20	-50.21
2010-08-21	-52.44
2010-08-22	-57.57
2010-08-23	-58.45
2010-08-25	-68.37
2010-08-26	-70.6
2010-08-27	-72.54
2010-08-28	-72.13
2010-08-29	-71.36
2010-08-30	-60.44
2010-08-31	-53.75
2010-09-01	-59.2
2010-09-02	-61.81
2010-09-03	-64.71
2010-09-04	-72.33
2010-09-05	-72.83
2010-09-06	-69.85
2010-09-07	-67.9
2010-09-08	-70.3
2010-09-09	-73.38
2010-09-11	-60.21
2010-09-12	-54.21
2010-09-13	-67.8
2010-09-14	-62.02
2010-09-15	-63.84
2010-09-16	-55.33
2010-09-17	-61.66
2010-09-18	-60.19
2010-09-20	-62.44
2010-09-21	-65.64
2010-09-22	-70.07
2010-09-23	-69.23
2010-09-24	-65.36
2010-09-25	-64.34
2010-09-27	-62.96
2010-09-28	-60.65
2010-09-29	-59.65
2010-09-30	-59.71
2010-10-01	-61.07
2010-10-02	-61.72
2010-10-03	-60.63
2010-10-04	-62.16
2010-10-07	-61.26
2010-10-08	-63.35
2010-10-09	-67.94
2010-10-10	-68.07
2010-10-11	-62.4
2010-10-12	-61.95
2010-10-14	-58.75
2010-10-15	-54.3
2010-10-16	-54.47
2010-10-17	-62.61
2010-10-18	-62.92
2010-10-20	-53.21
2010-10-21	-54.89
2010-10-22	-53.91
2010-10-23	-52.53
2010-10-24	-54.94
2010-10-25	-48.48
2010-10-26	-50.06
2010-10-28	-48.15
2010-10-29	-53.63
2010-10-30	-51.95
2010-10-31	-51.93
2010-11-01	-56.65
2010-11-02	-56.61
2010-11-03	-57.75
2010-11-06	-56.23
2010-11-07	-56.59
2010-11-08	-54.55
2010-11-09	-50.32
2010-11-10	-45.07
2010-11-11	-45.09
2010-11-12	-38.89
2010-11-13	-45.22
2010-11-14	-44.39
2010-11-15	-43.58
2010-11-16	-42.96
2010-11-17	-47.02
2010-11-18	-49.84
2010-11-19	-45.39
2010-11-21	-43.28
2010-11-22	-45.48
2010-11-25	-45.32
2010-11-27	-43.63
2010-11-29	-57.84
2010-12-01	-53.77
2010-12-02	-56.92
2010-12-08	-47.7
2010-12-10	-41.12
2010-12-11	-36.67
2010-12-14	-42.42
2010-12-15	-38.07
2010-12-16	-39.63
2010-12-18	-38.83
2010-12-19	-38.57
2010-12-22	-47.52
2010-12-29	-44.18
2011-01-02	-38.54
2011-01-09	-51.7
2011-01-10	-42.02
2011-01-11	-42.85
2011-01-13	-43.5
2011-01-22	-40.28
2011-01-23	-37.89
2011-02-01	-42.36
2011-02-07	-44.56
2011-02-08	-48
2011-02-09	-49.12
2011-02-10	-49.75
2011-02-12	-47.19
2011-02-13	-53.34
2011-02-16	-50.9
2011-02-18	-53.32
2011-02-19	-53.45
2011-02-20	-55.71
2011-02-21	-47.89
2011-02-24	-45.39
2011-02-25	-48.36
2011-02-27	-45.69
2011-02-28	-48.02
2011-03-01	-50.7
2011-03-03	-56.88
2011-03-04	-52.42
2011-03-07	-50.99
2011-03-08	-49.24
2011-03-09	-51.72
2011-03-15	-62.06
2011-03-19	-52.82
2011-03-22	-61.45
2011-03-23	-53.99
2011-03-24	-47.09
2011-03-27	-45.13
2011-03-29	-49.32
2011-04-06	-54.64
2011-04-17	-49.7
2011-04-18	-53.35
2011-04-19	-52.24
2011-04-21	-51.96
2011-04-22	-53.53
2011-04-24	-53.44
2011-04-26	-48.74
2011-05-01	-55.7
2011-05-02	-53.84
2011-05-09	-66.19
2011-05-12	-59.09
2011-05-14	-53.19
2011-05-15	-54.15
2011-05-19	-61.02
2011-05-23	-61.4
2011-06-05	-66.59
2011-07-08	-58.25
2011-08-10	-54.47
2011-08-12	-60.91
2011-08-16	-57.89
2011-09-01	-58
2011-09-04	-58.07
2011-09-06	-54.41
2011-09-11	-58.6
2011-09-12	-58.35
2011-09-13	-54.6
2011-09-15	-50.81
2011-09-16	-44.15
2011-09-20	-60.73
2011-09-21	-59.36
2011-09-22	-58.42
2011-09-23	-59.5
2011-10-03	-57.33
2011-10-10	-55.67
2011-10-11	-51.7
2011-10-15	-50.7
2011-10-19	-48.94
2011-10-26	-55.33
2011-10-28	-57.96
2011-11-18	-55.25
2012-02-15		-44.02
2012-02-21		-53.44
2012-02-22		-45.84
2012-02-23		-44.87
2012-02-24		-45.64
2012-02-27		-46.95
2012-02-29		-46.79
2012-03-01		-44.39
2012-03-02		-46.68
2012-03-04		-45.91
2012-03-13		-46.41
2012-03-20		-48.98
2012-03-22		-46.1
2012-03-26		-50.15
2012-04-10		-53.12
2012-04-13		-55.18
2012-04-14		-52.67
2012-04-18		-56.51
2012-04-20		-58.42
2012-04-21		-57.78
2012-04-26		-52.45
2012-05-02		-52.33
2012-05-03		-51.98
2012-05-07		-50.52
2012-05-10		-47.7
2012-05-11		-51.18
2012-05-14		-51.03
2012-05-31		-56.61
2012-06-05		-52.91
2012-06-09		-53.76
2012-06-10		-56.01
2012-06-11		-63.88
2012-06-12		-55.1
2012-06-13		-42.34
2012-06-14		-44.01
2012-06-19		-46.99
2012-06-21		-48.41
2012-06-22		-43.36
2012-06-25		-51.58
2012-06-27		-61.53
2012-07-01		-50.95
2012-07-07		-53.01
2012-07-09		-52.44
2012-07-15		-52.3
2012-07-20		-52.95
2012-07-22		-53.12
2012-07-25		-52.57
2012-07-27		-52.7
2012-08-01		-56.57
2012-08-03		-54.48
2012-08-04		-54.95
2012-08-06		-56.92
2012-08-13		-57.54
2012-08-16		-58.01
2012-08-17		-52.07
2012-08-20		-46.6
2012-08-22		-56.42
2012-08-27		-56.16
2012-08-29		-55.13
2012-08-30		-56.38
2012-09-03		-56.31
2012-09-05		-56.82
2012-09-08		-53.26
2012-09-11		-57.76
2012-09-13		-59.25
2012-09-16		-59.11
2012-09-20		-61.18
2012-09-26		-57.27
2012-10-05		-48.4
2012-10-07		-55.45
2012-10-12		-59.56
2012-10-13		-59.77

## Sheet: Fig3 NIVO
Dataset from Casado et al (2018) : Archival processes of the water stable isotope signal in East Antarctic ice cores
Contact : mathieu.casado@gmail.com
doi: 10.5194/tc-2017-243
Campaign NIVO: 2013 - 2016
For more information, refer to the manuscript
Date	δ18Os (‰)
2013-11-25	-55.66
2013-11-29	-55.0434
2013-12-03	-54.2493
2013-12-07	-55.8067
2013-12-10	-52.2675
2013-12-12	-50.1608
2013-12-15	-53.3718
2013-12-18	-52.9142
2013-12-22	-48.7015
2013-12-25	-50.8612
2013-12-27	-52.1848
2013-12-29	-52.3011
2014-01-01	-49.537
2014-01-04	-44.7406
2014-01-08	-41.6113
2014-01-09	-41.989
2014-01-13	-43.2218
2014-01-18	-39.4906
2014-01-22	-40.0774
2014-01-27	-36.83
2014-01-28	-48.6466
2014-02-04 12:00:00	-46.1744
2014-02-07 12:00:00	-43.255
2014-02-11 12:00:00	-44.6458
2014-02-18 12:00:00	-43.533
2014-02-21 12:00:00	-44.149
2014-02-25 12:00:00	-45.7738
2014-02-28 12:00:00	-38.9299
2014-03-04 12:00:00	-44.7781
2014-03-07 12:00:00	-45.1875
2014-03-11 12:00:00	-47.6565
2014-03-18 12:00:00	-40.8992
2014-03-21 12:00:00	-41.5601
2014-04-01 12:00:00	-46.4791
2014-04-08 12:00:00	-49.5976
2014-04-11 12:00:00	-45.5135
2014-04-15 12:00:00	-47.5311
2014-04-18 12:00:00	-45.4057
2014-04-25 12:00:00	-47.9423
2014-04-29 12:00:00	-44.0113
2014-05-02 12:00:00	-48.4974
2014-05-06 12:00:00	-46.6236
2014-05-13 12:00:00	-41.5599
2014-05-16 12:00:00	-51.8285
2014-05-20 12:00:00	-49.412
2014-05-28 12:00:00	-51.7281
2014-05-30 12:00:00	-51.4251
2014-06-03 12:00:00	-42.8834
2014-06-05 12:00:00	-48.0122
2014-06-10 12:00:00	-43.5753
2014-06-16 12:00:00	-52.5512
2014-06-23 12:00:00	-55.5565
2014-06-28 12:00:00	-54.6868
2014-07-01 12:00:00	-50.2608
2014-07-08 12:00:00	-55.4031
2014-07-12 12:00:00	-54.5222
2014-07-18 12:00:00	-52.2668
2014-07-22 12:00:00	-49.6568
2014-07-26 12:00:00	-53.6095
2014-07-29 12:00:00	-58.3867
2014-08-08 12:00:00	-58.2343
2014-08-12 12:00:00	-53.0204
2014-08-23 12:00:00	-56.6578
2014-08-29 12:00:00	-57.2401
2014-09-02 12:00:00	-57.2395
2014-09-09 12:00:00	-57.262
2014-09-12 12:00:00	-54.5991
2014-09-16 12:00:00	-56.9695
2014-09-19 12:00:00	-52.5455
2014-09-23 12:00:00	-51.1201
2014-09-25 12:00:00	-58.0106
2014-09-27 12:00:00	-57.574
2014-09-30 12:00:00	-57.1799
2014-10-07 12:00:00	-55.3017
2014-10-11 12:00:00	-53.8525
2014-10-14 12:00:00	-57.6955
2014-10-21 12:00:00	-55.9655
2014-10-24 12:00:00	-56.8429
2014-10-28 12:00:00	-54.982
2014-11-04 12:00:00	-57.7364
2014-11-07 12:00:00	-53.2197
2014-11-11 12:00:00	-56.4323
2014-11-14 12:00:00	-55.4614
2014-11-18 12:00:00	-55.9904
2014-11-25 12:00:00	-55.9016
2014-11-28 12:00:00	-56.7851
2014-12-02 12:00:00	-50.9742
2014-12-05 12:00:00	-54.0362
2014-12-12 12:00:00	-52.9824
2014-12-16 12:00:00	-55.2166
2014-12-19 12:00:00	-52.1262
2014-12-22 12:00:00	-50.4328
2014-12-26 12:00:00	-52.4235
2014-12-29 12:00:00	-49.2425
2015-01-02 12:00:00	-52.9731
2015-01-05 12:00:00	-51.3008
2015-01-09 12:00:00	-49.3441
2015-01-12 12:00:00	-49.5467
2015-01-16 12:00:00	-47.8087
2015-01-19 12:00:00	-49.651
2015-01-23 12:00:00	-46.4823
2015-01-26	-48.8074
2015-01-30	-48.5841
2015-02-04	-49.4098
2015-02-06	-49.1807
2015-02-09	-49.3682
2015-02-13	-48.5865
2015-02-20	-49.3001
2015-02-23	-51.5466
2015-02-27	-49.6503
2015-03-02	-50.249
2015-03-06	-50.8399
2015-03-09	-50.8297
2015-03-13	-50.3275
2015-03-16	-50.8486
2015-03-20	-51.3143
2015-03-23	-51.8927
2015-03-27	-49.2335
2015-03-30	-54.4524
2015-04-03	-49.736
2015-04-06	-50.457
2015-04-10	-50.2766
2015-04-13	-48.9219
2015-04-17	-49.5822
2015-04-20	-50.0698
2015-04-24	-50.1963
2015-04-27	-52.3378
2015-05-02	-50.9119
2015-05-04	-50.3107
2015-05-08	-51.0943
2015-05-11	-52.3675
2015-05-15	-51.3732
2015-05-18	-53.1402
2015-05-22	-54.5878
2015-05-25	-52.012
2015-05-29	-53.5
2015-06-01	-51.9112
2015-06-05	-51.9787
2015-06-08	-51.9259
2015-06-12	-51.972
2015-06-15	-52.3385
2015-06-18	-53.1103
2015-06-22	-53.4784
2015-06-26	-52.2786
2015-07-01	-54.0333
2015-07-03	-53.8731
2015-07-06	-55.6945
2015-07-10	-51.399
2015-07-15	-52.3007
2015-07-17	-53.1518
2015-07-20	-51.2544
2015-07-24	-52.5866
2015-07-27	-52.8227
2015-07-31	-53.1858
2015-08-03	-49.4379
2015-08-07	-50.535
2015-08-10	-55.3646
2015-08-14	-53.2331
2015-08-17	-51.1732
2015-08-21	-53.7524
2015-08-24	-53.3268
2015-08-28	-52.9028
2015-08-31	-51.7425
2015-09-04	-53.1498
2015-09-07	-51.7962
2015-09-11	-53.3182
2015-09-14	-52.7904
2015-09-18	-51.6225
2015-09-21	-52.1025
2015-09-25	-51.8033
2015-09-28	-52.6135
2015-10-02	-51.0396
2015-10-05	-53.2725
2015-10-09	-51.3492
2015-10-12	-53.8402
2015-10-16	-53.6112
2015-10-19	-53.7804
2015-10-23	-53.2942
2015-10-27	-53.3289
2015-10-30	-57.572
2015-11-02	-56.2144
2015-11-06	-55.5114
2015-11-09	-53.1447
2015-11-13	-53.2209
2015-11-16	-53.7141
2015-11-20	-53.7332
2015-11-24	-54.101
2015-11-27	-53.2362
2015-12-01	-52.0713
2015-12-04	-52.6216
2015-12-09	-51.1018
2015-12-11	-51.5807
2015-12-16	-48.68
2015-12-18	-49.1732
2015-12-22	-48.567
2015-12-26	-49.8075
2015-12-30	-49.6664
2016-01-05	-48.7131
2016-01-09	-49.1827
2016-01-12	-49.0133

## Sheet: Fig5
Dataset from Casado et al (2018) : Archival processes of the water stable isotope signal in East Antarctic ice cores
Contact : mathieu.casado@gmail.com
doi: 10.5194/tc-2017-243
RH, δ18O data measured at 2m from an inlet by the Picarro
Temperature at 3m by an ventilated thermometer HMP155
Surface temperature is measured with a Campbell scientific IR120 infrared
Date time (UTC)	RH (%)	δ18Ov (‰)	δ18Os (‰)	T 3m (°C)	T surf (°C)
2015-01-06 11:59:00	109.506	-71.2376		-29.5153	-32.3874
2015-01-06 12:59:00	104.697	-73.2328		-31.4836	-34.8204
2015-01-06 13:59:00	104.51	-72.0719		-33.5961	-37.3323
2015-01-06 14:59:00	103.431	-73.335		-35.3581	-39.4453
2015-01-06 15:59:00	112.865	-71.9183	-48.96	-36.9956	-40.7908
2015-01-06 16:59:00	121.164	-76.2792		-37.6279	-41.1006
2015-01-06 17:59:00	130.06	-72.5999	-48.87	-37.9029	-40.9456
2015-01-06 18:59:00	173.51	-70.2091	-48.23	-37.2464	-39.3507
2015-01-06 19:59:00	151.07	-70.919	-48.32	-36.2589	-37.4041
2015-01-06 20:59:00	146.587	-68.5101	-48.16	-34.838	-34.9317
2015-01-06 21:59:00	172.062	-67.4368	-49.15	-33.263	-32.1306
2015-01-06 22:59:00	159.964	-63.4424	-49.53	-31.7618	-29.9282
2015-01-06 23:59:00	154.846	-65.6865	-50.29	-30.2868	-28.4784
2015-01-07 00:59:00	165.179	-63.7831	-49.65	-29.485	-27.5151
2015-01-07 01:59:00	134.817	-65.2245	-50.03	-28.9225	-26.905
2015-01-07 02:59:00	124.202	-65.7726		-28.2862	-26.3795
2015-01-07 03:59:00	114.181	-66.3585	-49.18	-27.6237	-25.8709
2015-01-07 04:59:00	113.852	-65.9504	-49.29	-27.1272	-25.4797
2015-01-07 05:59:00	109.821	-67.3052	-49.34	-26.6897	-25.357
2015-01-07 06:59:00	107.03	-68.0621	-49.34	-26.5197	-25.4892
2015-01-07 07:59:00	100.887	-69.457	-49.93	-26.4447	-26.0525
2015-01-07 08:59:00	97.0519	-69.6948	-49.36	-26.8584	-26.9461
2015-01-07 09:59:00	104.612	-69.012	-49.61	-27.4459	-28.4965
2015-01-07 10:59:00	99.1508	-69.8229	-49.84	-29.011	-30.8514
2015-01-07 11:59:00	95.4738	-70.1078	-50.18	-30.9235	-33.589

## Sheet: Fig7
Dataset from Casado et al (2018) : Archival processes of the water stable isotope signal in East Antarctic ice cores
Contact : mathieu.casado@gmail.com
doi: 10.5194/tc-2017-243
Campaign NIVO: 2013 - 2016
For more information, refer to the manuscript
Date	δ18Os (‰)	δ18Osub (‰)
2013-11-25	-55.66	-58.7
2013-11-26	-55.75	-48.66
2013-11-28	-56.66	-56.72
2013-11-29	-50.12	-49.93
2013-11-30	-55.3509
2013-12-01	-54.22	-55.66
2013-12-02	-57.52	-56.5
2013-12-03	-54.54	-55.56
2013-12-04	-54.71	-55.67
2013-12-05	-52.97	-54.8
2013-12-06	-57.17	-56.12
2013-12-07	-55.42	-53.3
2013-12-08	-54.55	-53.86
2013-12-09	-58.22	-56.05
2013-12-10	-51.88	-47.99
2013-12-11	-46.3	-46.41
2013-12-12	-54.22	-55.75
2013-12-15	-54.52	-55.75
2013-12-16	-52.88	-55.49
2013-12-17	-56.39	-58.46
2013-12-18	-53.4222	-57.4861
2013-12-19	-48.69	-57.6
2013-12-22	-49.6572	-57.1915
2013-12-24	-49.2527	-54.3886
2013-12-25	-49.2256	-55.1175
2013-12-26	-53.3313	-55.3687
2013-12-27	-53.3261	-56.7155
2013-12-29	-48.6978	-56.4506
2013-12-31	-52.0301	-51.3692
2014-01-01	-52.95	-55.5748
2014-01-02	-52.5218	-55.4396
2014-01-03	-41.6352	-54.4749
2014-01-04	-50.4717	-56.6877
2014-01-05	-37.3998
2014-01-06	-34.4965	-41.1796
2014-01-08	-39.198	-37.2852
2014-01-09	-51.054	-55.4766
2014-01-10	-52.5327	-55.8709
2014-01-11	-49.2772	-48.9253
2014-01-12	-35.6575	-33.1009
2014-01-13	-35.816
2014-01-15	-35.29	-46.37
2014-01-16	-44.4	-47.03
2014-01-17	-43.95	-50.35
2014-01-18	-39.29	-42.32
2014-01-19	-34.73	-45.24
2014-01-20	-36.07	-35.96
2014-01-22	-42.62	-35.97
2014-01-23	-35.89	-47.74
2014-01-24	-35.59	-32.36
2014-01-25	-52.03	-54.75
2014-01-27	-36.83	-51.14

## Sheet: Fig8 DCoxy
Dataset from Casado et al (2018) : Archival processes of the water stable isotope signal in East Antarctic ice cores
Contact : mathieu.casado@gmail.com
doi: 10.5194/tc-2017-243
Campaign DCoxy: 1978 - 80
For more information, refer to the manuscript
DСoxy 80		DСoxy 05
Depth (m)	δ18ON (‰)	Depth (m)	δ18ON (‰)
0.04	-54.3	0.01	-47.07
0.075	-52	0.02	-47.19
0.11	-44.35	0.03	-50.85
0.145	-41.05	0.04	-52.16
0.18	-40.7	0.05	-52.82
0.215	-42.75	0.06	-53
0.2508	-47.2	0.07	-52.98
0.2867	-47.3	0.08	-53
0.3225	-47.7	0.09	-53.17
0.3583	-47.6	0.1	-53.15
0.3942	-47.35	0.11	-53.3
0.43	-47.75	0.13	-53.3
0.465	-44.65	0.14	-53.3
0.5	-43.4	0.15	-53.34
0.535	-47.3	0.16	-53.31
0.57	-50.1	0.17	-52.9
0.605	-52.35	0.18	-52.46
0.64	-52.15	0.19	-51.8
0.675	-52.45	0.2	-50.52
0.71	-52.2	0.21	-50.18
0.746	-51	0.22	-50.18
0.782	-48.35	0.23	-50.88
0.818	-47.05	0.24	-51.04
0.854	-48	0.25	-51.37
0.89	-48.1	0.26	-51.91
0.9243	-47.9	0.27	-51.64
0.9586	-48	0.28	-52.12
0.9929	-48.95	0.29	-52.43
1.0271	-48.45	0.3	-52.51
1.0614	-46.85	0.31	-52.27
1.0957	-46.95	0.32	-52.41
1.13	-49.25	0.33	-52.12
1.1656	-51.9	0.34	-51.84
1.2012	-49.35	0.35	-51.8
1.2369	-46.95	0.36	-51.95
1.2725	-46.85	0.38	-51.96
1.3081	-49.65	0.39	-50.49
1.3438	-51.3	0.4	-51.01
1.3794	-52.45	0.41	-49.94
1.415	-50.75	0.42	-47.72
1.451	-49.8	0.43	-46.29
1.487	-49.8	0.44	-44.97
1.523	-51.05	0.45	-45.8
1.559	-50.7	0.46	-46.17
1.595	-48.95	0.47	-47.62
1.631	-47.7	0.48	-48.03
1.667	-48.85	0.49	-46.94
1.703	-49.15	0.5	-47.06
1.739	-50	0.55	-45.37
1.775	-50.9	0.58	-46.56
1.8079	-50.5	0.61	-47.2
1.8407	-51.65	0.63
1.8736	-51.9	0.64
1.9064	-51.85	0.65
1.9393	-51.4	0.66
1.9721	-49.85	0.67
2.005	-48.8	0.68
2.04	-49.15	0.69
2.075	-50.1	0.7
2.11	-49.55	0.71	-47.2
2.145	-49.15	0.72	-45.82
2.18	-48.8	0.779	-42.79
2.214	-48.65	0.78	-42.79
2.248	-49	0.8	-43.84
2.282	-50.4	0.82	-46.69
2.316	-52.8	0.83
2.35	-54.25	0.84
2.384	-52.95	0.85
2.418	-50.6	0.86
2.452	-49.9	0.88
2.486	-49.95	0.89
2.52	-49.95	0.9
		0.91
		0.92
		0.93	-47.43
		0.94	-47.49
		0.95	-47.77
		0.96	-48.63
		0.97	-49.53
		0.98	-49.7
		0.99	-50.31
		1	-50.11
		1.01	-50.2
		1.02	-49.66
		1.03	-49.7
		1.04	-49.06
		1.05	-48.94
		1.06	-49.26
		1.07	-49.23
		1.08	-48.87
		1.09	-49.25
		1.1	-49
		1.11	-48.42
		1.13	-48.12
		1.14	-49.16
		1.15	-49.25
		1.16	-49.82
		1.17	-50.11
		1.18	-50.9
		1.19	-52.01
		1.2	-51.77
		1.21	-51.98
		1.22	-52.03
		1.23	-52.24
		1.25	-52.5
		1.26	-52.94
		1.27	-53.22
		1.31	-53.13
		1.32	-52.72
		1.33	-52.22
		1.34	-52.28
		1.35	-51.94
		1.36	-51.32
		1.38	-51.06
		1.39	-50.24
		1.4	-49
		1.41	-49.33
		1.42	-48.81
		1.43	-48.65
		1.44	-47.8
		1.45	-47.74
		1.46	-47.98
		1.47	-48.04
		1.48	-48.09
		1.49	-48.19
		1.5	-48.61
		1.51	-49.67
		1.52	-50.17
		1.53	-50.74
		1.54	-50.64
		1.55	-49.92
		1.56	-49.94
		1.57	-49.46
		1.58	-49.99
		1.59	-49.72
		1.6	-50.29
		1.61	-50.45
		1.63	-50.77
		1.64	-50.9
		1.65	-51.28
		1.66	-51.19
		1.67	-50.69
		1.68	-50.68
		1.69	-51
		1.7	-51.76
		1.71	-51.47
		1.72	-51.4
		1.73	-51.75
		1.74	-51.96
		1.75	-52.09
		1.76	-52.35
		1.77	-52.93
		1.78	-52.57
		1.79	-53.05
		1.8	-53.51
		1.81	-53.33
		1.82	-53.64
		1.83	-53.29
		1.84	-52.96
		1.85	-52.5
		1.86	-51.67
		1.88	-50.89
		1.89	-50.54
		1.9	-50.41
		1.91	-50.12
		1.92	-49.94
		1.93	-49.48
		1.94	-49.16
		1.95	-48.88
		1.96	-49
		1.97	-49.3
		1.98	-49.24
		1.99	-49.42
		2	-49.52

## Sheet: Fig9 
Contact : mathieu.casado@gmail.com
doi: 10.5194/tc-2017-243
Campaign DCoxy: 1978 - 80
For more information, refer to the manuscript
P09-2015		P17-2015
Depth (m)	δ18ON (‰)	Depth (m)	δ18ON (‰)
0	-51.49	0	-50.92
0.015	-56.46	0.015	-55.74
0.03	-57.85	0.03	-54.58
0.045	-58.5	0.045	-52.42
0.06	-57.95	0.06	-51.82
0.075	-55.06	0.075	-51.68
0.09	-53.04	0.09	-51.78
0.11	-51.77	0.105	-51.95
0.13	-51.59	0.12	-51.02
0.145	-50.09	0.135	-48.4
0.16	-49.58	0.15	-42.49
0.175	-51.25	0.165	-38.36
0.19	-52.71	0.18	-37.12
0.205	-53.07	0.195	-36.5
0.22	-53.55	0.21	-35.42
0.235	-53.51	0.225	-37.22
0.245	-53.59	0.24	-41.09
0.26	-53.6	0.255	-47.36
0.275	-53.57	0.27	-52.26
0.29	-52.63	0.285	-56.68
0.315	-53.04	0.3	-57.38
0.34	-52.06	0.33	-55.55
0.365	-51.78	0.36	-49.93
0.39	-51.96	0.39	-48.27
0.415	-52.9	0.42	-49.74
0.44	-53.95	0.45	-51.21
0.465	-53.48	0.48	-51.42
0.49		0.51	-50.41
0.515	-54.46	0.55	-50.29
0.54	-54.8	0.6	-50.93
0.6	-52.78	0.65	-51.26
0.65	-54.34	0.7	-47.63
0.7	-52.65	0.75
0.75	-51.58	0.8	-53.93
0.8	-51.5	0.85	-52.73
0.85	-51.23	0.9	-50.86
0.9	-49.72	0.95	-50.01
0.95	-47.33	1	-50.01
1	-47.33
