# Supplementary material for: Archival processes of the water stable isotope signal in East Antarctic ice cores
Source: Copernicus journal article supplement (doi:10.5194/tc-12-1745-2018), 2018-05-24
Supplement: Supplementary file 1 [file tc-12-1745-2018-supplement.zip › tc-12-1745-2018-supplement-title-page.pdf]

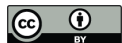

## *Supplement of*

# **Archival processes of the water stable isotope signal in East Antarctic ice cores**

**Mathieu Casado et al.**

*Correspondence to:* Mathieu Casado ([mathieu.casado@gmail.com](mailto:mathieu.casado@gmail.com))

- [tc-12-1745-2018-supplement-title-page.pdf](#)
- [Dataset\\_TC\\_2018.xlsx](#)
- [Time lapse growth of snow crystal-HD.mp4](#)

The copyright of individual parts of the supplement might differ from the CC BY 4.0 License.
